# Supplementary material for: Analysis of Oxidized 1-Palmitoyl-2-Arachidonoyl-Sn-Glycero-3 Phosphocholine Products in Uremic Patients by LC-ESI/MS
Source: MDPI journal article supplement (doi:10.3390/separations9080192), 2022-07-26
Supplement: s1 [file s1]

Archive with 1 entries (1 files):
- separations-1731756-supplementary.pdf
