# Supplementary material for: Analysis of Oxidized 1-Palmitoyl-2-Arachidonoyl-Sn-Glycero-3 Phosphocholine Products in Uremic Patients by LC-ESI/MS
Source: MDPI journal article supplement (doi:10.3390/separations9080192), 2022-07-26
Supplement: s1 [file s1 › separations-1731756-supplementary.pdf]

# Supplementary Materials

## Analysis of oxidized 1-palmitoyl-2-arachidonoyl-sn-glycero-3 phosphocholine products in uremic patients by LC-ESI/MS

Chiz-Tzung Chang<sup>2, 3‡</sup>, Chun-Cheng Wang<sup>2, 3‡</sup>, I-Ting Chang<sup>1‡</sup>, Min-Hui Hsia<sup>1‡</sup>, Chao-Jung Chen<sup>4, 5</sup>, Hsin-Bai Zou<sup>1</sup>, Yu-Qing Chen<sup>1</sup>, Wen-Chien Chiu<sup>1</sup>, Zhi-Ru Lin<sup>1</sup> and Mine-Yine Liu<sup>1\*</sup>

<sup>1</sup> Department of Chemistry, National Changhua University of Education, Changhua, Taiwan

<sup>2</sup> Department of Medicine, China Medical University Hospital, Taichung, Taiwan

<sup>3</sup> College of Medicine, China Medical University, Taichung, Taiwan

<sup>4</sup> Graduate Institute of Integrated Medicine, China Medical University, Taichung, Taiwan

<sup>5</sup> Proteomics Core Laboratory, Department of Medical Research, China Medical University Hospital, Taichung, Taiwan

### Contents of Supporting Information [1-6]:

Table S1: Proposed structures of the short-chain ox-PAPC products

Table S2: Proposed structures of the long-chain ox-PAPC products

Proposed structures of the short-chain ox-PAPC products

| m/z | Name                                              | ion                 | m/z | Name                                                 | ion                 |
|-----|---------------------------------------------------|---------------------|-----|------------------------------------------------------|---------------------|
| 478 | 1-palmitoyl-3-phosphatidylcholine                 | [M+H] <sup>+</sup>  | 622 | 1-palmitoyl-2-(4-hexenedioic acid)-GPC               | [M+H] <sup>+</sup>  |
| 496 | 1-palmitoyl-2-hydroxy-sn-glycero-3-phosphocholine | [M+H] <sup>+</sup>  | 632 | 1-palmitoyl-2-(pentanedioic acid)-GPC                | [M+Na] <sup>+</sup> |
| 594 | 1-palmitoyl-2-(5-oxo-pentanoic acid)-GPC          | [M+H] <sup>+</sup>  | 636 | 1-palmitoyl-2-(4-hydroxy-7-oxo-5-heptenoic acid)-GPC | [M+H] <sup>+</sup>  |
| 610 | 1-palmitoyl-2-(pentanedioic acid)-GPC             | [M+H] <sup>+</sup>  | 650 | 1-palmitoyl-2-(5-hydroxy-8-oxo-6-octenoic acid)-GPC  | [M+H] <sup>+</sup>  |
| 616 | 1-palmitoyl-2-(5-oxo-pentanoic acid)-GPC          | [M+Na] <sup>+</sup> | 666 | 1-palmitoyl-2-(5-hydroxy-6-octendioic acid)-GPC      | [M+H] <sup>+</sup>  |
| 620 | 1-palmitoyl-2-(7-oxo-5-heptenoic acid)-GPC        | [M+H] <sup>+</sup>  | 690 | 1-palmitoyl-2-(5-hydroxy-6,8-undecedioic acid)-GPC   | [M+H] <sup>+</sup>  |

Proposed structures of the long-chain ox-PAPC products

| m/z   | Name                                                                                           | ion                 | m/z   | Name                                                               | ion                 |
|-------|------------------------------------------------------------------------------------------------|---------------------|-------|--------------------------------------------------------------------|---------------------|
| 820.5 | 1-palmitoyl-2-(hydroxy-eicosatetraenoic acid)-GPC                                              | [M+Na] <sup>+</sup> | 850.5 | 1-palmitoyl-2-(hydroxy-hydroperoxide-eicosatetraenoic acid)-GPC    | [M+Na] <sup>+</sup> |
| 828.5 | 1-palmitoyl-2-(D2/E2-isoprostanes)-GPC                                                         | [M+H] <sup>+</sup>  | 852.5 | 1-palmitoyl-2-(hydroxy-hydroperoxide-eicosatetraenoic acid)-GPC    | [M+Na] <sup>+</sup> |
| 836.5 | 1-palmitoyl-2-(hydroperoxide-eicosatetraenoic acid)-GPC                                        | [M+Na] <sup>+</sup> | 868.5 | 1-palmitoyl-2-(di-hydroperoxide-eicosatetraenoic acid)-GPC         | [M+Na] <sup>+</sup> |
| 846.5 | PAPC_5-epoxy_8-E/D-IsoP_14-epoxy<br>1-palmitoyl-2-(di-hydroperoxide-eicosatetraenoic acid)-GPC | [M+H] <sup>+</sup>  | 884.5 | 1-palmitoyl-2-(hydroxy-di-hydroperoxide-eicosatetraenoic acid)-GPC | [M+Na] <sup>+</sup> |
|       |                                                                                                |                     | 900.5 | 1-palmitoyl-2-(tri-hydroperoxide-eicosatetraenoic acid)-GPC        | [M+H] <sup>+</sup>  |

## References

1. Reis, A.; Domingues, P.; Domingues, M.R. Structural Motifs in Primary Oxidation Products of Palmitoyl-Arachidonoyl-Phosphatidylcholines by LC-MS/MS. *J. Mass Spectrom.* 2013, 48, 1207–1216.
2. Reis, A.; Domingues, P.; Ferrer-Correia, A.J. Fragmentation Study of Short-Chain Products Derived from Oxidation of Di-acylphosphatidylcholines by Electrospray Tandem Mass Spectrometry: Identification of Novel Short-Chain Products. *Rapid Commun. Mass Spectrom.* 2004, 18, 2849–2858.
3. Reis, A.; Domingues, P.; Ferrer-Correia, A.J. Tandem Mass Spectrometry of Intact Oxidation Products of Diacylphosphatidyl-cholines: Evidence for The Occurrence of The Oxidation of the Phosphocholine Head and Differentiation of Isomers. *J. Mass Spectrom.* 2004, 39, 1513–1522.
4. Reis, A.; Domingues, M.; Amado, F.M.; Ferrer-Correia, A.; Domingues, P. Separation of Peroxidation Products of Diacyl-Phosphatidylcholines by Reversed-Phase Liquid Chromatography–Mass Spectrometry. *Biomed Chromatogr.* 2005, 19, 129–137.
5. Reis, A.; Domingues, P.; Ferrer-Correia, A.; Domingues, M. Identification of Free Radicals of Glycerophosphatidylcholines Containing  $\omega$ -6 Fatty Acids Using Spin Trapping Coupled with Tandem Mass Spectrometry. *Free Radic. Res.* 2007, 41, 432–443.
6. Reis, A.; Domingues, M.; Amado, F.; Ferrer-Correia, A.; Domingues, P. Radical Peroxidation of Palmitoyl-Lineloyl-Glycerophosphocholine Liposomes: Identification of Long-Chain Oxidised Products by Liquid Chromatography–Tandem Mass Spectrometry. *J. Chromatogr. B.* 2007, 855, 186–199.
